# Supplementary material for: Residual mitochondrial transmembrane potential decreases unsaturated fatty acid level in sake yeast during alcoholic fermentation
Source: PeerJ. 2016 Jan 14;4:e1552. doi: 10.7717/peerj.1552 (PMC4734444; doi:10.7717/peerj.1552)
Supplement: Supplemental Information 1 [file peerj-04-1552-s001.xlsx]

## Sheet: yeastsummary
	20140529c4h	20140529i4h	20140529c12h	20140529i12h	20140529c24h	20140529i24h	20140529c36h	20140529i36h	20140523c4h	20140523i4h	20140523c12h	20140523i12h	20140523c24h	20140523i24h	20140523c36h	20140523i36h	20140604c4h	20140604i4h	20140604c12h	20140604i12h	20140604c24h	20140604i24h	20140604c36h	20140604i36h
palmitic acid	15.0512	14.6279	21.4336	18.977	21.7583	18.2115	21.1662	19.2482	14.7108	15.1514	20.9611	18.7413	22.2398	18.9017	21.6674	18.4276	14.013	13.2427	22.9908	19.8161	22.874	18.6709	22.4769	18.0856			20140529c																				20140529i
palmitoleic acid	38.5396	40.5595	36.2126	37.6578	36.1546	37.8376	36.3861	38.3267	39.3994	39.223	36.7392	37.8388	35.6723	37.6663	37.0133	38.6636	39.9855	39.8383	35.6275	36.1613	35.9836	37.2841	36.5483	37.9441			4			avg	ste	12			avg	ste	24			avg	ste	36			avg	ste	4
stearic acid	9.23017	9.16783	9.8998	10.4186	9.93721	10.4733	9.89053	10.1702	8.71101	9.52368	10.1177	9.81662	10.3448	10.7453	9.66801	10.0124	8.90312	9.09512	10.4593	10.5578	10.3234	10.7561	10.1493	10.3152		palmitic acid	15.0512	14.7108	14.013	14.5917	0.249779	21.4336	20.9611	22.9908	21.7952	0.501268	21.7583	22.2398	22.874	22.2907	0.264123	21.1662	21.6674	22.4769	21.7702	0.312138	14.6279	15.1514	13.2427
oleic acid	37.179	35.6447	32.454	32.9466	32.1499	33.4776	32.5571	32.2549	37.1788	36.1019	32.182	33.6032	31.7431	32.6867	31.6513	32.8964	37.0983	37.8239	30.9223	33.4648	30.8189	33.2889	30.8256	33.6551		palmitoleic acid	38.5396	39.3994	39.9855	39.3082	0.34323	36.2126	36.7392	35.6275	36.1931	0.262449	36.1546	35.6723	35.9836	35.9368	0.115422	36.3861	37.0133	36.5483	36.6492	0.153645	40.5595	39.223	39.8383
																										stearic acid	9.23017	8.71101	8.90312	8.9481	0.123884	9.8998	10.1177	10.4593	10.1589	0.133103	9.93721	10.3448	10.3234	10.2018	0.108277	9.89053	9.66801	10.1493	9.90261	0.113678	9.16783	9.52368	9.09512
																										oleic acid	37.179	37.1788	37.0983	37.152	0.0219531	32.454	32.182	30.9223	31.8528	0.385673	32.1499	31.7431	30.8189	31.5707	0.321899	32.5571	31.6513	30.8256	31.678	0.408768	35.6447	36.1019	37.8239
																																					twotailed
																										controlavg	4	12	24	36	controlste	4	12	24	36		ttest	4	12	24	36
																										palmitic acid	14.5917	21.7952	22.2907	21.7702		0.249779	0.501268	0.264123	0.312138		palmitic acid	0.72313	0.0318267	0.00142491	0.0035897
																										palmitoleic acid	39.3082	36.1931	35.9368	36.6492		0.34323	0.262449	0.115422	0.153645		palmitoleic acid	0.378097	0.189004	0.0016846	0.00417702
																										stearic acid	8.9481	10.1589	10.2018	9.90261		0.123884	0.133103	0.108277	0.113678		stearic acid	0.194842	0.727304	0.0541696	0.197315
																										oleic acid	37.152	31.8528	31.5707	31.678		0.0219531	0.385673	0.321899	0.408768		oleic acid	0.443479	0.0711637	0.0285541	0.125357
																										inhibitoravg	4	12	24	36	inhibitorste	4	12	24	36
																										palmitic acid	14.3407	19.1781	18.5947	18.5871		0.465471	0.266633	0.165832	0.281987
																										palmitoleic acid	39.8736	37.2193	37.596	38.3115		0.315733	0.434563	0.133721	0.169885
																										stearic acid	9.26221	10.2644	10.6583	10.1659		0.108239	0.185929	0.0756288	0.0714739
																										oleic acid	36.5235	33.3382	33.151	32.9355		0.54235	0.163376	0.194963	0.33081
[truncated: 17 more columns]

## Sheet: 20150126komekikoji1
ピーク#	保持時間	面積	高さ	マーク		濃度	濃度単位	化合物ID#	化合物名	面積%	理論段数(USP)	理論段高さ(USP)	分離度(USP)
1	2.43	182516695	51879588	S		0				99.985	11771	12.744	--
2	2.786	19555	5632	T		0				0.011	15393	9.745	3.975
3	20.417	1730	288		0.109148	0				0.001	294147	0.51	146.67
4	22.852	3170	541		0.2	0				0.002	350780	0.428	15.967
5	25.712	1184	207		0.0747003	0				0.001	466270	0.322	18.758
6	26.803	1711	291			0				0.001	467399	0.321	7.096
合計		182544045	51886547			0				100
		7795

## Sheet: 20150126moromitcr13-40
ピーク#	保持時間	面積	高さ	マーク		濃度	濃度単位	化合物ID#	化合物名	面積%	理論段数(USP)	理論段高さ(USP)	分離度(USP)
1	2.427	185589266	52990084	S		0				99.759	11945	12.557	--
2	2.784	20750	6079	T		0				0.011	15954	9.402	4.032
3	6.356	1405	290			0				0.001	41029	3.656	33.432
4	15.369	4244	751			0				0.002	167748	0.894	65.403
5	16.318	1249	225			0				0.001	191140	0.785	6.34
6	20.429	126805	22376		8.59112	0				0.068	306372	0.49	27.688
7	21.099	3967	719			0				0.002	327520	0.458	4.537
8	21.294	23911	4141	V	1.61999	0				0.013	319321	0.47	1.313
9	22.849	2952	511		0.2	0				0.002	354069	0.424	10.22
10	25.208	10401	1764		0.704675	0				0.006	412926	0.363	15.194
11	25.716	69184	11865		4.68726	0				0.037	473528	0.317	3.314
12	25.986	2351	397	V		0				0.001	280004	0.536	1.56
13	26.464	23164	3990			0				0.012	463020	0.324	2.717
14	26.813	115044	20589		7.79431	0				0.062	540498	0.278	2.314
15	27.534	40443	6993			0				0.022	526383	0.285	4.842
16	28.289	2478	434			0				0.001	566445	0.265	5.002
合計		186037616	53071206			0				100

## Sheet: 20150126komekoji2
ピーク#	保持時間	面積	高さ	マーク		濃度	濃度単位	化合物ID#	化合物名	面積%	理論段数(USP)	理論段高さ(USP)	分離度(USP)
1	2.43	182516695	51879588	S		0				99.985	11771	12.744	--
2	2.786	19555	5632	T		0				0.011	15393	9.745	3.975
3	20.417	1730	288		0.109148	0				0.001	294147	0.51	146.67
4	22.852	3170	541		0.2	0				0.002	350780	0.428	15.967
5	25.712	1184	207		0.0747003	0				0.001	466270	0.322	18.758
6	26.803	1711	291		0.10795	0				0.001	467399	0.321	7.096
合計		182544045	51886547			0				100

## Sheet: 20150126moromitcr13-40v2
ピーク#	保持時間	面積	高さ	マーク		濃度	濃度単位	化合物ID#	化合物名	面積%	理論段数(USP)	理論段高さ(USP)	分離度(USP)
1	2.428	181934470	51327021	S		0				99.759	11680	12.843	--
2	2.784	22031	6400	T		0				0.012	15635	9.594	3.986
3	6.357	1472	305			0				0.001	42036	3.568	33.531
4	10.396	1079	206			0				0.001	88608	1.693	30.635
5	15.368	4180	744			0				0.002	171432	0.875	34.506
6	16.319	1189	207			0				0.001	184638	0.812	6.335
7	20.427	126736	23112		9.14731	0				0.069	324440	0.462	27.814
8	21.099	4711	839			0				0.003	312657	0.48	4.564
9	21.292	22482	3919	V	1.62266	0				0.012	323595	0.464	1.283
10	21.947	1112	199			0				0.001	353353	0.425	4.407
11	22.85	2771	476			0				0.002	343723	0.436	5.95
12	25.207	10607	1786			0				0.006	413246	0.363	15.074
13	25.715	69682	11647	S	5.02938	0				0.038	474229	0.316	3.316
14	26.463	19526	3344			0				0.011	462008	0.325	4.906
15	26.811	116123	20563		8.38131	0				0.064	532140	0.282	2.299
16	27.534	33150	5594			0				0.018	504788	0.297	4.786
17	28.29	2585	442			0				0.001	529582	0.283	4.87
合計		182373905	51406806			0				100

## Sheet: 20140529k7c4h
ピーク#	保持時間	面積	高さ	マーク		濃度	濃度単位	化合物ID#	化合物名	面積%	理論段数(USP)	理論段高さ(USP)	分離度(USP)
1	2.439	181895388	50019101	S		0				99.959	11104	13.509	--
2	2.802	41629	11673	T		0				0.023	14967	10.022	3.943
3	20.543	5011	877		15.0512	0				0.003	292843	0.512	145.753
4	21.227	12831	2276		38.5396	0				0.007	323149	0.464	4.541
5	25.333	3073	528		9.23017	0				0.002	433814	0.346	27.082
6	25.84	12378	2108		37.179	0				0.007	449025	0.334	3.293
合計		181970311	50036564			0				100
		33293

## Sheet: 20140529k7i4h
ピーク#	保持時間	面積	高さ	マーク		濃度	濃度単位	化合物ID#	化合物名	面積%	理論段数(USP)	理論段高さ(USP)	分離度(USP)
1	2.441	183503486	50277006	S		0				99.96	11078	13.541	--
2	2.805	43255	12133	T		0				0.024	14859	10.095	3.936
3	20.547	3890	681		14.6279	0				0.002	299745	0.5	146.539
4	21.23	10786	1877		40.5595	0				0.006	317125	0.473	4.543
5	25.336	2438	425		9.16783	0				0.001	447279	0.335	27.16
6	25.843	9479	1660		35.6447	0				0.005	457072	0.328	3.33
7	37.827	1795	156			0				0.001	272981	0.549	54.167
8	38.403	1374	108			0				0.001	279163	0.537	1.984
合計		183576503	50294046			0				100
		26593

## Sheet: 20140529k7c12h
ピーク#	保持時間	面積	高さ	マーク		濃度	濃度単位	化合物ID#	化合物名	面積%	理論段数(USP)	理論段高さ(USP)	分離度(USP)
1	2.441	179663740	49234766			0				99.94	11128	13.48	--
2	2.805	58890	16373	V		0				0.033	14843	10.106	3.937
3	20.549	10310	1802		21.4336	0				0.006	298219	0.503	146.285
4	21.233	17419	3047		36.2126	0				0.01	324252	0.463	4.563
5	25.338	4762	834		9.8998	0				0.003	448351	0.335	27.324
6	25.844	15611	2692		32.454	0				0.009	463563	0.324	3.336
合計		179770731	49259514			0				100
		48102

## Sheet: 20140529k7i12h
ピーク#	保持時間	面積	高さ	マーク		濃度	濃度単位	化合物ID#	化合物名	面積%	理論段数(USP)	理論段高さ(USP)	分離度(USP)
1	2.445	179726491	49584641			0				99.949	11191	13.403	--
2	2.808	53801	14999	V		0				0.03	14598	10.276	3.921
3	20.549	7049	1228		18.977	0				0.004	297237	0.505	145.579
4	21.232	13988	2447		37.6578	0				0.008	314740	0.477	4.52
5	25.34	3870	661		10.4186	0				0.002	439830	0.341	27.004
6	25.846	12238	2099		32.9466	0				0.007	461512	0.325	3.322
合計		179817437	49606074			0				100
		37145

## Sheet: 20140529k7c24h
ピーク#	保持時間	面積	高さ	マーク		濃度	濃度単位	化合物ID#	化合物名	面積%	理論段数(USP)	理論段高さ(USP)	分離度(USP)
1	2.442	180857627	49352193	S		0				99.951	11001	13.635	--
2	2.806	47524	13219	T		0				0.026	14742	10.175	3.918
3	20.549	8905	1536		21.7583	0				0.005	292741	0.512	145.227
4	21.233	14797	2613		36.1546	0				0.008	322540	0.465	4.541
5	25.338	4067	716		9.93721	0				0.002	459510	0.326	27.452
6	25.846	13158	2260		32.1499	0				0.007	464636	0.323	3.369
合計		180946077	49372538			0				100
		40927

[truncated: 19 more sheets: 20140529k7i24h, 20140529k7c36h, 20140529k7i36h, 20140523k7c4h, 20140523k7i4h, 20140523k7c12h, 20140523k7i12h, 20140523k7c24h, 20140523k7i24h, 20140523k7c36h, 20140523k7i36h, 20140604k7c4h, 20140604k7i4h, 20140604k7c12h, 20140604k7i12h, 20140604k7c24h, 20140604k7i24h, 20140604k7c36h, 20140604k7i36h]
